# Supplementary material for: Melanophilin Stimulates Myosin-5a Motor Function by Allosterically Inhibiting the Interaction between the Head and Tail of Myosin-5a
Source: Springer Nature journal article supplement (doi:10.1038/srep10874), 2015-06-03
Supplement: 41598_2015_BFsrep10874_MOESM1_ESM.pdf [file 41598_2015_BFsrep10874_MOESM1_ESM.pdf]

## SUPPLEMENTAL INFORMATION

### **Melanophilin Stimulates Myosin-5a Motor Function by Allosterically Inhibiting the Interaction between the Head and Tail of Myosin-5a**

Lin-Lin Yao<sup>a,1</sup>, Qing-Juan Cao<sup>a,b,1</sup>, Hai-Man Zhang<sup>a,b,1</sup>, Jie Zhang<sup>a</sup>, Yang Cao<sup>a</sup>, and Xiang-dong Li<sup>a,2</sup>

<sup>a</sup>Group of cell motility and muscle contraction, Chinese Academy of Sciences, Beijing 100101, China;

<sup>b</sup>University of Chinese Academy of Sciences, Beijing 100049, China

<sup>1</sup> These authors contributed equally to this work.

<sup>2</sup>To whom correspondence should be addressed: Xiang-dong Li, Institute of Zoology, Chinese Academy of Sciences, Beijing 100101, China. Telephone: 86-10-6480-6015. Email: [lixd@ioz.ac.cn](mailto:lixd@ioz.ac.cn)

## Supplemental Figure 1

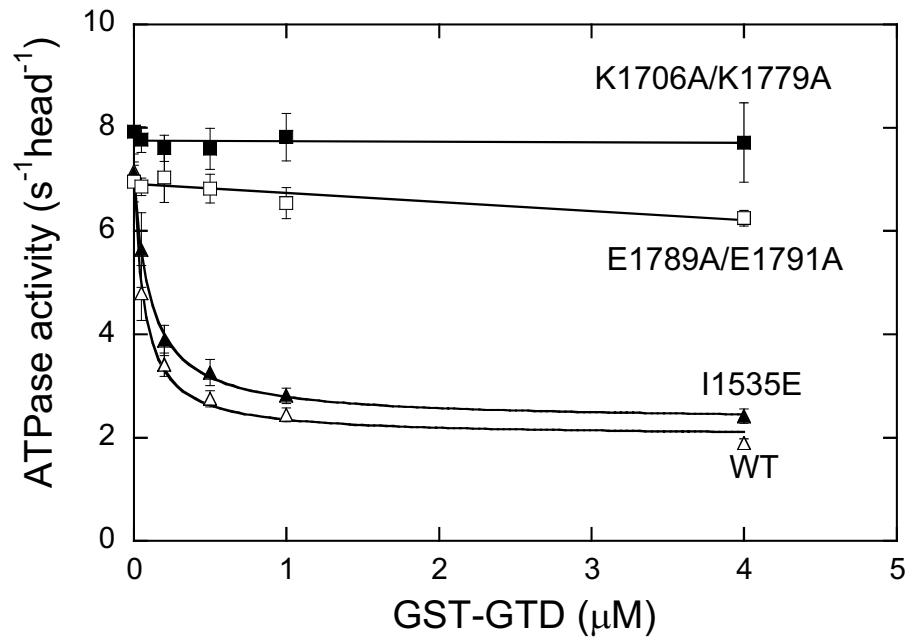

**Figure S1. The effects of GTD mutants on the Myo5a-HMM ATPase activity.** The Myo5a-HMM ATPase activity was strongly inhibited by GST-GTD-WT and -I1535E mutant. In contrast, the Myo5a-HMM ATPase activity was not inhibited by GST-GTD-K1706A/K1779A mutant and only weakly inhibited by GST-GTD-E1789A/E1791A mutant. The ATPase assays were conducted in 20 mM MOPS-KOH, pH 7.0, 0.1 M NaCl, 1 mM MgCl<sub>2</sub>, 1 mM DTT, 0.25 mg/ml BSA, 12  $\mu\text{M}$  CaM, 0.5 mM ATP, 2.5 mM phosphoenolpyruvate, 20 U/ml pyruvate kinase, 1 mM EGTA, 40  $\mu\text{M}$  actin, ~30 nM Myo5a-HMM, and 0 - 4  $\mu\text{M}$  GST-GTD. Data are means  $\pm$  std from three independent assays.

## Supplemental Figure 2

A

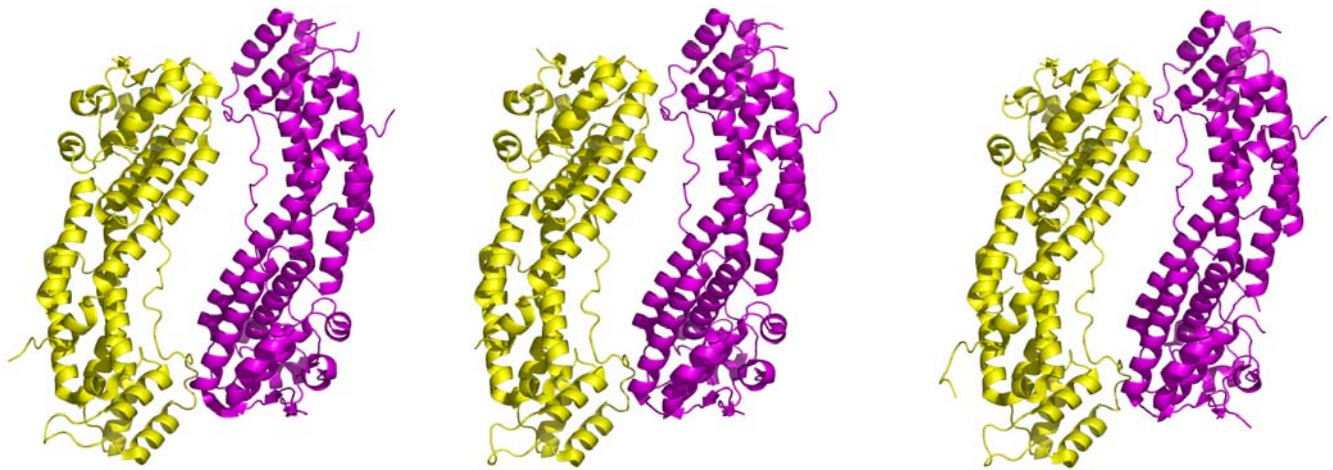

Mouse Myo5a-GTD  
(PDB ID: 3WB8)

Human Myo5a-GTD  
(PDB ID: 4LX1)

Human Myo5a-GTD  
(PDB ID: 4J5L)

B

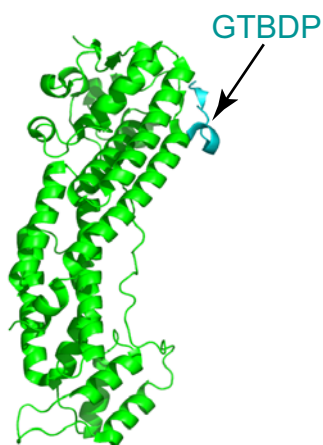

Human M5a-GTD/GTBDP  
(PDB ID: 4LX2)

C

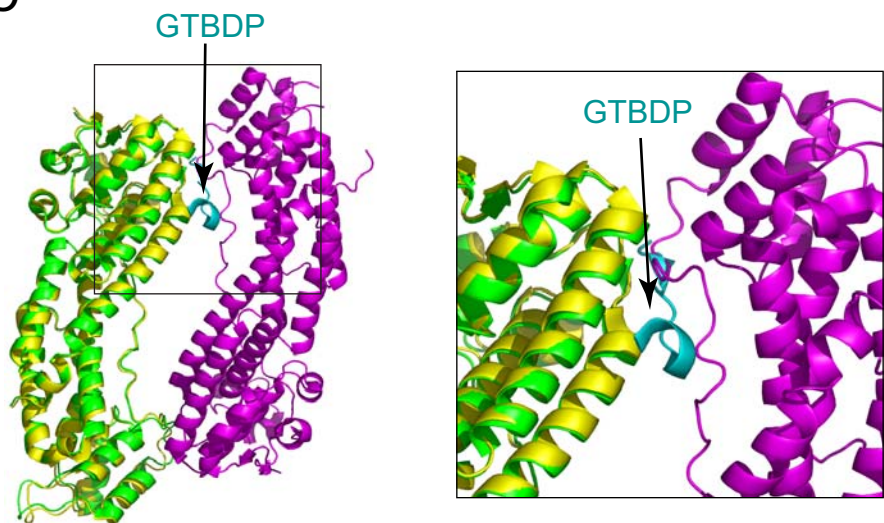

Superimposed human M5a-GTD and M5a-GTD/GTBDP  
(PDB IDs: 4LX1, 4LX2)

**Figure S2. GTBDP binds to the interface of Myo5a-GTD dimer.** (A) The crystal structures of human Myo5a-GTD and mouse Myo5a-GTD. There are 4 dimers in the crystal structure of mouse Myo5a-GTD and only one dimer (chain a and c) is shown here. (B) The crystal structure of human Myo5a-GTD/GTBDP complex. (C) Superimposed structures of human Myo5a-GTD (shown in yellow and magenta) and Myo5a-GTD/GTBDP complex (shown in green and cyan).
